# Supplementary material for: NF-κB-induced NOX1 activation promotes gastric tumorigenesis through the expansion of SOX2-positive epithelial cells
Source: PubMed Central journal article supplement (PMC6756228; doi:10.1038/s41388-019-0702-0), 2019-01-30
Supplement: 41388_2019_702_MOESM9_ESM.pdf [file 41388_2019_702_MOESM9_ESM.pdf]

Supplementary Table 1. Activation of NF- $\kappa$ B pathway in gastric lesions.

|                         | human stomach cancer (TCGA) |                    |                    |                            |                    |                    |
|-------------------------|-----------------------------|--------------------|--------------------|----------------------------|--------------------|--------------------|
|                         | intestinal                  |                    |                    | diffusive                  |                    |                    |
| Upstream Regulator      | Predicted Activation State  | Activation z-score | p-value of overlap | Predicted Activation State | Activation z-score | p-value of overlap |
| NF $\kappa$ B (complex) | Activated <sup>a</sup>      | 4.841              | 3.02E-11           | Activated                  | 5.089              | 1.38E-13           |

|                         | human gastritis (GSE60662) |                    |                    |                            |                    |                    |                            |                    |                    |
|-------------------------|----------------------------|--------------------|--------------------|----------------------------|--------------------|--------------------|----------------------------|--------------------|--------------------|
|                         | intestinal metaplasia      |                    |                    | mild gastritis             |                    |                    | severe gastritis           |                    |                    |
| Upstream Regulator      | Predicted Activation State | Activation z-score | p-value of overlap | Predicted Activation State | Activation z-score | p-value of overlap | Predicted Activation State | Activation z-score | p-value of overlap |
| NF $\kappa$ B (complex) | Activated                  | 2.446              | 1.11E-04           | Activated                  | 5.518              | 9.32E-19           | Activated                  | 5.889              | 2.42E-13           |

<sup>a</sup>, z-score > 2.0 is considered as significantly activated.
