# Supplementary material for: NF-κB-induced NOX1 activation promotes gastric tumorigenesis through the expansion of SOX2-positive epithelial cells
Source: PubMed Central journal article supplement (PMC6756228; doi:10.1038/s41388-019-0702-0), 2019-01-30
Supplement: 41388_2019_702_MOESM10_ESM.pdf [file 41388_2019_702_MOESM10_ESM.pdf]

Supplementary Table 2. The results of upstream regulator analysis by IPA.

| Upstream regulator | K19-C2mE/wild-type <sup>a</sup> |          | Apo-treated/control <sup>b</sup> |          |
|--------------------|---------------------------------|----------|----------------------------------|----------|
|                    | z-score                         | p-value  | z-score                          | p-value  |
| MYC                | 4.89                            | 1.53E-19 | 0.941                            | 3.78E-06 |
| PDGF BB            | 4.485                           | 1.36E-09 | 2.658                            | 5.01E-10 |
| TNF                | 4.462                           | 1.41E-39 | 0.628                            | 3.17E-05 |
| SOX2               | 3.615                           | 2.07E-08 | -0.505                           | 2.20E-05 |
| PRKCD              | 1.786                           | 1.45E-02 | 0.05                             | 4.15E-05 |
| TREM1              | 1.688                           | 1.24E-10 | 2.714                            | 7.70E-05 |
| CCND1              | 1.463                           | 1.26E-02 | 1.982                            | 2.43E-05 |
| TP63               | 1.313                           | 4.99E-22 | 0.714                            | 4.49E-10 |
| CREBBP             | 1.309                           | 7.17E-09 | N.D.                             | 2.45E-05 |
| MGEA5              | 1.192                           | 3.25E-16 | -0.775                           | 9.23E-05 |
| TGFB1              | 1.176                           | 7.28E-28 | 2.294                            | 3.78E-05 |

<sup>a</sup>, Upregulated pathways in K19-C2mE mouse gastritis tissues compared with wild-type normal stomach are listed (z-score > 1).

<sup>b</sup>, These listed pathways were further examined using differentially expressed genes in apocynin-treated MKN45 cells compared with untreated control cells.
